# Supplementary material for: Vegetarian Diet, Growth, and Nutrition in Early Childhood: A Longitudinal Cohort Study
Source: Oxford University Press journal article supplement (doi:10.1542/peds.2021-052598), 2022-05-02
Supplement: peds_2021052598supplementarydata.pdf [file peds_2021052598supplementarydata.pdf]

## Supplemental Information

### SUPPLEMENTAL METHODS

#### Measurement of Covariates

Birth weight was determined by parent-report. Breastfeeding duration was measured from parent response to the question, "For how long has your child been breastfed?" Children who never breastfed were classified as having a duration of 0 months. Those currently breastfeeding were assigned a duration equal to their age at the corresponding clinic visit. Sugar-sweetened beverage intake was measured from parent response to the question, "How many cups of each drink your child has currently in a

typical day? (1 cup = 8 oz = 250 mL): 100% juice (apple, orange, etc), sweetened drinks (Kool-Aid, Sunny D), tea, or soda/pop." Daily cow's milk intake (of any milk fat content) was measured from parent response to the question, "How many cups of milk does your child have currently in a typical day? (1 cup = 8 oz = 250 mL)." Maternal ethnicity was determined by report of the self-reported ethnic origins of the biological mother, and categorized as European, Asian, mixed ethnicity, or other (which included African, Arab, and Latin American). Self-reported family income was determined by the

response to the question, "What was your total family income before taxes last year?" and categorized as <\$30 000, \$30 000 to \$79 000, \$80 000 to \$149 000, and >\$150 000. Maternal height and weight were measured at the participants' health supervision visit by trained research assistants and BMI was calculated using standard methods ( $\text{kg}/\text{m}^2$ ). Child intake of supplements containing iron or vitamin D were measured by parent-report from the question, "Does your child take any vitamins or supplements regularly?" and selected "iron," "multivitamin with iron," or "vitamin D," respectively.

**SUPPLEMENTAL TABLE 3** Baseline Characteristics for Participants With and Without Blood Sample

| Characteristics                                        | Children With Blood Sample<br>( <i>n</i> = 3586) | Children Without Blood Sample<br>( <i>n</i> = 5321) | All Participants<br>( <i>n</i> = 8907) |
|--------------------------------------------------------|--------------------------------------------------|-----------------------------------------------------|----------------------------------------|
| Age, y, mean (SD)                                      | 2.6 (1.6)                                        | 1.9 (1.4)                                           | 2.2 (1.5)                              |
| Sex, male, <i>n</i> (%)                                | 1888 (52.7)                                      | 2777 (52.3)                                         | 4665 (52.4)                            |
| Birth weight, kg, mean (SD)                            | 3.3 (0.7)                                        | 3.3 (0.6)                                           | 3.3 (0.6)                              |
| Breastfeeding duration, mo, mean (SD)                  | 10.6 (7.6)                                       | 9.7 (6.8)                                           | 10.0 (7.1)                             |
| Daily cow's milk intake (cups/d), mean (SD)            | 1.6 (1.3)                                        | 1.3 (1.3)                                           | 1.4 (1.3)                              |
| Sugar sweetened beverage intake (mL/day), <i>n</i> (%) |                                                  |                                                     |                                        |
| 0                                                      | 1502 (45.2)                                      | 2859 (59.1)                                         | 4361 (53.5)                            |
| 1–249                                                  | 592 (17.8)                                       | 674 (13.9)                                          | 1266 (15.5)                            |
| 250–499                                                | 620 (18.7)                                       | 673 (13.9)                                          | 1293 (15.8)                            |
| 500–749                                                | 610 (18.4)                                       | 628 (13.0)                                          | 1238 (15.2)                            |
| Iron supplement, yes, <i>n</i> (%)                     | 252 (7.2)                                        | 253 (4.8)                                           | 505 (6.8)                              |
| Vitamin D supplement, yes, <i>n</i> (%)                | 1448 (41.1)                                      | 2252 (42.8)                                         | 3700 (42.1)                            |
| Maternal BMI, mean (SD)                                | 25.1 (5.1)                                       | 25.0 (4.9)                                          | 25.0 (5.0)                             |
| Maternal height, mean (SD)                             | 163.7 (7.2)                                      | 163.8 (7.3)                                         | 163.8 (7.3)                            |
| Maternal age at birth, mean (SD)                       | 33.4 (4.8)                                       | 33.2 (4.6)                                          | 33.3 (4.7)                             |
| Ethnicity, <i>n</i> (%)                                |                                                  |                                                     |                                        |
| European                                               | 2082 (64.0)                                      | 3029 (62.4)                                         | 5111 (63.0)                            |
| Asian                                                  | 619 (19.0)                                       | 952 (19.6)                                          | 1571 (19.4)                            |
| Mixed ethnicity                                        | 192 (5.9)                                        | 295 (6.1)                                           | 487 (6.0)                              |
| Other                                                  | 358 (11.0)                                       | 580 (11.9)                                          | 938 (11.6)                             |
| Family income, CAD \$, <i>n</i> (%)                    |                                                  |                                                     |                                        |
| <\$30 000                                              | 225 (7.2)                                        | 355 (7.8)                                           | 580 (7.6)                              |
| \$30 000–79 999                                        | 609 (19.6)                                       | 787 (17.3)                                          | 1396 (18.2)                            |
| \$80 000–149 999                                       | 993 (32.0)                                       | 1434 (31.5)                                         | 2427 (31.7)                            |
| >\$150 000                                             | 1279 (41.2)                                      | 1973 (43.4)                                         | 3252 (42.5)                            |
| Vegetarian diet, yes, <i>n</i> (%)                     | 94 (2.6)                                         | 154 (2.9)                                           | 248 (2.8)                              |
| Vegan diet, yes, <i>n</i> (%)                          | 8 (0.2)                                          | 17 (0.3)                                            | 25 (0.3)                               |
| zBMI mean (SD)                                         | 0.09 (1.1)                                       | −0.002 (1.1)                                        | 0.04 (1.1)                             |
| zHeight mean (SD)                                      | 0.24 (1.2)                                       | 0.36 (1.3)                                          | 0.31 (1.2)                             |
| Weight status, <i>n</i> (%)                            |                                                  |                                                     |                                        |
| Underweight (zBMI <−2)                                 | 108 (3.1)                                        | 181 (3.5)                                           | 289 (3.3)                              |
| Normal ( $\geq -2$ zBMI $\leq 1$ )                     | 2739 (78.2)                                      | 4053 (79.0)                                         | 6792 (78.6)                            |
| Overweight (>1 zBMI <2)                                | 500 (14.3)                                       | 695 (13.5)                                          | 1195 (13.8)                            |
| Obese (zBMI >2)                                        | 157 (4.5)                                        | 203 (4.0)                                           | 360 (4.2)                              |

CAD, Canadian dollars.

**SUPPLEMENTAL TABLE 4** Likelihood Ratio Test Results for Interaction Models

| Model <sup>a</sup>  | Cow's Milk Interaction | Child Age Interaction |
|---------------------|------------------------|-----------------------|
| zBMI                | 0.69                   | 0.97                  |
| zHeight             | 0.45                   | 0.60                  |
| Ferritin            | 0.29                   | 0.96                  |
| 25(OH)D             | 0.67                   | 0.42                  |
| Non-HDL cholesterol | 0.03                   | 0.89                  |
| Total cholesterol   | 0.04                   | 0.92                  |
| LDL                 | 0.02                   | 0.97                  |
| HDL                 | 0.82                   | 0.86                  |
| Triglycerides       | 0.51                   | 0.94                  |

<sup>a</sup> Likelihood of ratio test results comparing the adjusted model with the interaction model.

**SUPPLEMENTAL TABLE 5** Relationship Between Vegetarian Diet and Serum Lipids With Effect Modification By Cow's Milk Intake

|                                                  | Outcome Variables <sup>a,b</sup>                            |                                                              |                                                            |
|--------------------------------------------------|-------------------------------------------------------------|--------------------------------------------------------------|------------------------------------------------------------|
|                                                  | Non-HDL Cholesterol (mg/dL)<br>Estimate (95% CI; <i>P</i> ) | Total Cholesterol<br>(mg/dL)<br>Estimate (95% CI; <i>P</i> ) | LDL Cholesterol<br>(mg/dL)<br>Estimate (95% CI; <i>P</i> ) |
| Vegetarian: yes                                  | -6.56 (-11.97 to -1.93; .008)                               | -7.34 (-12.74 to -1.93; .007)                                | -6.56 (-11.20 to -1.54; .009)                              |
| Cow's milk intake, cups/d                        | 1.16 (0.77 to 1.54; <.001)                                  | 1.16 (0.77 to 1.54; <.001)                                   | 1.16 (0.77 to 1.54; <.001)                                 |
| Interaction: vegetarian diet × cow's milk intake | 3.09 (0.39 to 5.41; .03)                                    | 3.09 (0.12 to 3.86; .04)                                     | 3.09 (5.02 to 5.41; .02)                                   |

To convert mg/dL to SI units (mmol/L), divide results by 38.6.

<sup>a</sup> All models were adjusted for child age, visit date (restricted cubic splines, 5 knots), sex, zBMI, birth weight, breastfeeding duration, cow's milk intake, sugar-containing beverage intake, maternal age at birth, maternal ethnicity, maternal BMI, and self-reported family income.

<sup>b</sup> Time as child age in restricted cubic splines, 5 knots.
